# Supplementary material
Source: ML conference proceedings conference paper supplement (https://openreview.net/forum?id=L81mgR8RH8)
Supplement: supplementary_material [file attachment]

## A THE USE OF LARGE LANGUAGE MODELS (LLMs)

This research employed multiple large language models as test subjects for benchmark development and validation. Additionally, LLMs were used minimally for sentence-level language refinement and polishing to improve clarity of expression. All core research contributions, methodology, and analysis were conducted independently by the authors without AI assistance.

## B DETAILED EXPERIMENT RESULTS

### B.1 RESULTS OF PERCEPTION TASKS

| Models                | Metric               | Counting Task  |             |              |              |                    |             |              |              |
|-----------------------|----------------------|----------------|-------------|--------------|--------------|--------------------|-------------|--------------|--------------|
|                       |                      | Total Counting |             |              |              | Type-wise Counting |             |              |              |
|                       |                      | Easy           | Medium      | Hard         | Total        | Easy               | Medium      | Hard         | Total        |
| Gemini-2.5-pro        | ACC ( $\uparrow$ )   | <b>0.88</b>    | <b>0.65</b> | <b>0.45</b>  | <b>0.65</b>  | <b>0.83</b>        | 0.63        | 0.46         | 0.64         |
|                       | MSE ( $\downarrow$ ) | <b>0.39</b>    | <b>2.30</b> | <b>27.36</b> | <b>10.02</b> | <b>0.67</b>        | <b>3.75</b> | 35.81        | 13.41        |
| GPT-4o                | ACC ( $\uparrow$ )   | 0.75           | 0.51        | 0.26         | 0.51         | 0.76               | 0.57        | 0.30         | 0.54         |
|                       | MSE ( $\downarrow$ ) | 0.80           | 2.63        | 53.72        | 19.05        | 2.15               | 6.96        | 75.44        | 28.18        |
| Claude-3.7-sonnet     | ACC ( $\uparrow$ )   | 0.72           | 0.27        | 0.01         | 0.36         | 0.73               | 0.57        | <b>0.35</b>  | <b>0.55</b>  |
|                       | MSE ( $\downarrow$ ) | 0.56           | 3.63        | 50.96        | 18.38        | 2.29               | <b>6.67</b> | 63.57        | 24.18        |
| Grok-3                | ACC ( $\uparrow$ )   | 0.47           | 0.14        | 0.04         | 0.22         | 0.70               | 0.53        | 0.27         | 0.50         |
|                       | MSE ( $\downarrow$ ) | 3.58           | 21.50       | 157.05       | 60.71        | 2.49               | 6.92        | 68.51        | 26.48        |
| Doubao-1.5-vision-pro | ACC ( $\uparrow$ )   | 0.60           | 0.10        | 0.01         | 0.24         | 0.71               | 0.53        | 0.30         | 0.51         |
|                       | MSE ( $\downarrow$ ) | 0.67           | 5.93        | 107.78       | 38.13        | 2.56               | 9.14        | <b>62.59</b> | <b>24.76</b> |
| Kimi-VL-A3B           | ACC ( $\uparrow$ )   | 0.23           | 0.13        | 0.08         | 0.15         | 0.63               | 0.46        | 0.23         | 0.44         |
|                       | MSE ( $\downarrow$ ) | 15.68          | 28.04       | 103.86       | 49.19        | 2.86               | 13.44       | 94.38        | 34.96        |
| Qwen2.5-VL-72B        | ACC ( $\uparrow$ )   | 0.67           | 0.42        | 0.21         | 0.43         | 0.68               | 0.47        | 0.31         | 0.49         |
|                       | MSE ( $\downarrow$ ) | 1.09           | 3.98        | <b>53.90</b> | <b>19.59</b> | 1.87               | <b>6.55</b> | <b>47.35</b> | <b>18.59</b> |

Table 7: Counting Task Performance Across Different Models

| Models                | Element Classification Task (ACC $\uparrow$ ) |             |             |             |
|-----------------------|-----------------------------------------------|-------------|-------------|-------------|
|                       | Easy                                          | Medium      | Hard        | Total       |
| Gemini-2.5-pro        | <b>0.96</b>                                   | <b>0.94</b> | <b>0.91</b> | <b>0.94</b> |
| GPT-4o                | 0.93                                          | 0.93        | 0.88        | 0.91        |
| Claude-3.7-sonnet     | 0.90                                          | 0.87        | 0.84        | 0.83        |
| Grok-3                | 0.84                                          | 0.84        | 0.83        | 0.84        |
| Doubao-1.5-vision-pro | 0.94                                          | 0.93        | <b>0.91</b> | 0.93        |
| Kimi-VL-A3B           | 0.69                                          | 0.65        | 0.63        | 0.66        |
| Qwen2.5-VL-72B        | 0.88                                          | 0.86        | 0.83        | 0.86        |

Table 8: Element Classification Task Performance Across Different Models (in decimals)

| Models                | Metric             | Interconnect Perception Task |             |             |             |                           |             |             |             |
|-----------------------|--------------------|------------------------------|-------------|-------------|-------------|---------------------------|-------------|-------------|-------------|
|                       |                    | Connection Judgment          |             |             |             | Connection Identification |             |             |             |
|                       |                    | Easy                         | Medium      | Hard        | Total       | Easy                      | Medium      | Hard        | Total       |
| Gemini-2.5-pro        | ACC ( $\uparrow$ ) | <b>0.86</b>                  | <b>0.83</b> | <b>0.85</b> | <b>0.85</b> | <b>0.78</b>               | <b>0.51</b> | <b>0.50</b> | <b>0.60</b> |
|                       | F1 ( $\uparrow$ )  | -                            | -           | -           | -           | <b>0.93</b>               | <b>0.86</b> | <b>0.86</b> | <b>0.88</b> |
| GPT-4o                | ACC ( $\uparrow$ ) | 0.74                         | 0.71        | 0.74        | 0.73        | 0.27                      | 0.12        | 0.10        | 0.16        |
|                       | F1 ( $\uparrow$ )  | -                            | -           | -           | -           | 0.74                      | 0.61        | 0.59        | 0.65        |
| Claude-3.7-sonnet     | ACC ( $\uparrow$ ) | 0.74                         | 0.76        | 0.77        | 0.76        | 0.36                      | 0.25        | 0.22        | 0.27        |
|                       | F1 ( $\uparrow$ )  | -                            | -           | -           | -           | 0.74                      | 0.71        | 0.68        | 0.71        |
| Grok-3                | ACC ( $\uparrow$ ) | 0.72                         | 0.72        | 0.67        | 0.70        | 0.25                      | 0.16        | 0.13        | 0.18        |
|                       | F1 ( $\uparrow$ )  | -                            | -           | -           | -           | 0.70                      | 0.63        | 0.62        | 0.65        |
| Doubao-1.5-vision-pro | ACC ( $\uparrow$ ) | 0.78                         | 0.74        | 0.77        | 0.76        | 0.30                      | 0.13        | 0.14        | 0.19        |
|                       | F1 ( $\uparrow$ )  | -                            | -           | -           | -           | 0.72                      | 0.60        | 0.59        | 0.64        |
| Kimi-VL-A3B           | ACC ( $\uparrow$ ) | 0.55                         | 0.54        | 0.51        | 0.53        | 0.13                      | 0.09        | 0.10        | 0.10        |
|                       | F1 ( $\uparrow$ )  | -                            | -           | -           | -           | 0.57                      | 0.51        | 0.52        | 0.53        |
| Qwen2.5-VL-72B        | ACC ( $\uparrow$ ) | 0.75                         | 0.78        | 0.77        | 0.77        | 0.20                      | 0.10        | 0.13        | 0.14        |
|                       | F1 ( $\uparrow$ )  | -                            | -           | -           | -           | 0.56                      | 0.48        | 0.53        | 0.52        |

Table 9: Interconnect Perception Task Performance Across Different Models

| Models                | Location Description Task (ACC $\uparrow$ ) |             |             |             |
|-----------------------|---------------------------------------------|-------------|-------------|-------------|
|                       | Easy                                        | Medium      | Hard        | Total       |
| Gemini-2.5-pro        | <b>0.61</b>                                 | <b>0.60</b> | <b>0.61</b> | <b>0.61</b> |
| GPT-4o                | 0.44                                        | 0.31        | 0.37        | 0.37        |
| Claude-3.7-sonnet     | 0.49                                        | 0.45        | 0.50        | 0.48        |
| Grok-3                | 0.45                                        | 0.55        | 0.49        | 0.50        |
| Doubao-1.5-vision-pro | 0.51                                        | 0.47        | 0.38        | 0.45        |
| Kimi-VL-A3B           | 0.32                                        | 0.33        | 0.27        | 0.31        |
| Qwen2.5-VL-72B        | 0.57                                        | 0.59        | 0.53        | 0.56        |

Table 10: Location Description Task Performance Across Different Models

| Models                | Topology Generation Task (NED $\downarrow$ ) |             |             |             |
|-----------------------|----------------------------------------------|-------------|-------------|-------------|
|                       | Easy                                         | Medium      | Hard        | Total       |
| Gemini-2.5-pro        | <b>0.73</b>                                  | <b>0.95</b> | <b>1.34</b> | <b>0.91</b> |
| GPT-4o                | 1.31                                         | 1.56        | 1.46        | 1.40        |
| Claude-3.7-sonnet     | 1.72                                         | 1.64        | 1.51        | 1.65        |
| Grok-3                | 2.08                                         | 1.71        | 1.37        | 1.84        |
| Doubao-1.5-vision-pro | 1.54                                         | 1.52        | 1.68        | 1.57        |
| Kimi-VL-A3B           | -                                            | -           | -           | -           |
| Qwen2.5-VL-72B        | 2.65                                         | 2.14        | 1.95        | 2.38        |

Table 11: Topology Generation Task Performance Across Different Models

## B.2 RESULTS OF ANALYSIS TASKS

| Models                | Function Identification Task (ACC $\uparrow$ ) |                             |
|-----------------------|------------------------------------------------|-----------------------------|
|                       | Function (text as options)                     | Function (image as options) |
| Gemini-2.5-pro        | <b>0.95</b>                                    | <b>0.94</b>                 |
| GPT-4o                | 0.93                                           | 0.89                        |
| Claude-3.7-sonnet     | 0.88                                           | 0.74                        |
| Grok-3                | 0.77                                           | 0.22                        |
| Doubao-1.5-vision-pro | 0.94                                           | 0.93                        |
| Kimi-VL-A3B           | 0.59                                           | 0.28                        |
| Qwen2.5-VL-72B        | 0.78                                           | 0.85                        |

Table 12: Function Identification Task Performance Across Different Models

| Models                | Circuit Partition Task |               |                |               |                |               |                |               |
|-----------------------|------------------------|---------------|----------------|---------------|----------------|---------------|----------------|---------------|
|                       | Easy                   |               | Medium         |               | Hard           |               | Overall        |               |
|                       | ACC $\uparrow$         | F1 $\uparrow$ | ACC $\uparrow$ | F1 $\uparrow$ | ACC $\uparrow$ | F1 $\uparrow$ | ACC $\uparrow$ | F1 $\uparrow$ |
| Gemini-2.5-pro        | <b>0.52</b>            | <b>0.81</b>   | <b>0.33</b>    | <b>0.81</b>   | <b>0.20</b>    | <b>0.78</b>   | <b>0.35</b>    | <b>0.80</b>   |
| GPT-4o                | 0.21                   | 0.55          | 0.07           | 0.59          | 0.06           | 0.57          | 0.11           | 0.57          |
| Claude-3.7-sonnet     | 0.29                   | 0.66          | 0.11           | 0.62          | 0.08           | 0.62          | 0.16           | 0.64          |
| Grok-3                | 0.26                   | 0.59          | 0.17           | 0.63          | 0.03           | 0.56          | 0.15           | 0.59          |
| Doubao-1.5-vision-pro | 0.26                   | 0.63          | 0.04           | 0.61          | 0.03           | 0.54          | 0.11           | 0.60          |
| Kimi-VL-A3B           | 0.03                   | 0.29          | 0.00           | 0.00          | 0.00           | 0.00          | 0.00           | 0.28          |
| Qwen2.5-VL-72B        | 0.06                   | 0.44          | 0.00           | 0.49          | 0.00           | 0.43          | 0.02           | 0.45          |

Table 13: Circuit Partition Task Performance Across Different Models

| Models                | Reasoning Task (ACC $\uparrow$ ) |             |             |             |
|-----------------------|----------------------------------|-------------|-------------|-------------|
|                       | Op-amp                           | LDO         | Bandgap     | Comparator  |
| Gemini-2.5-pro        | 0.94                             | 0.90        | 0.88        | <b>0.96</b> |
| GPT-4o                | 0.78                             | 0.84        | 0.64        | 0.84        |
| Claude-3.7-sonnet     | <b>0.95</b>                      | <b>0.96</b> | 0.78        | <b>0.96</b> |
| Grok-3                | 0.60                             | 0.72        | 0.52        | 0.60        |
| Doubao-1.5-vision-pro | 0.90                             | 0.84        | 0.80        | 0.80        |
| Kimi-VL-A3B           | 0.81                             | 0.46        | <b>0.86</b> | 0.84        |
| Qwen2.5-VL-72B        | 0.81                             | 0.90        | 0.72        | 0.84        |

Table 14: Reasoning Task Performance Across Different Models

| Models                | Caption Generation Task(ACC ↑) |             |             |
|-----------------------|--------------------------------|-------------|-------------|
|                       | Undergraduate                  | Graduate    | Total       |
| Gemini-2.5-pro        | 0.63                           | 0.72        | 0.70        |
| GPT-4o                | 0.58                           | 0.63        | 0.61        |
| Claude-3.7-sonnet     | <b>0.89</b>                    | <b>1.00</b> | <b>0.98</b> |
| Grok-3                | 0.21                           | 0.47        | 0.41        |
| Doubao-1.5-vision-pro | 0.74                           | 0.69        | 0.70        |
| Kimi-VL-A3B           | 0.74                           | 0.70        | 0.71        |
| Qwen2.5-VL-72B        | <b>0.89</b>                    | 0.75        | 0.78        |

Table 15: Caption Generation Task Performance Across Different Models

| Models                | TQA Task(ACC ↑) |             |             |             |
|-----------------------|-----------------|-------------|-------------|-------------|
|                       | Undergraduate   | Graduate    | Engineer    | Total       |
| Gemini-2.5-pro        | 0.89            | 0.89        | 0.39        | 0.72        |
| GPT-4o                | 0.88            | 0.88        | <b>0.58</b> | <b>0.78</b> |
| Claude-3.7-sonnet     | <b>0.90</b>     | 0.88        | 0.45        | 0.74        |
| Grok-3                | 0.86            | 0.84        | 0.53        | 0.74        |
| Doubao-1.5-vision-pro | 0.88            | 0.88        | 0.52        | 0.76        |
| Kimi-VL-A3B           | 0.80            | 0.82        | 0.16        | 0.59        |
| Qwen2.5-VL-72B        | 0.85            | 0.85        | 0.37        | 0.69        |
| DeepSeek-R1           | 0.89            | <b>0.90</b> | <b>0.58</b> | 0.77        |

Table 16: TQA Task Performance Across Different Models (Decimal Format)

### B.3 RESULTS OF DESIGN TASKS

#### B.3.1 CIRCUIT DESIGN TASK

| Id | Type           | Circuit Description                            | Id | Type            | Circuit Description                   |
|----|----------------|------------------------------------------------|----|-----------------|---------------------------------------|
| 1  | Amplifier      | Single-stage common-source amp. with R load    | 15 | Op-amp          | Telescopic cascode op-amp             |
| 2  | Amplifier      | 3-stage common-source amp. with R load         | 16 | Oscillator      | RC phase-shift oscillator             |
| 3  | Amplifier      | Common-drain amp. with R load                  | 17 | Oscillator      | A Wien bridge oscillator              |
| 4  | Amplifier      | Single-stage common-gate amp. with R load      | 18 | Integrator      | Op-amp integrator                     |
| 5  | Amplifier      | Single-stage cascode amp. with R load          | 19 | Differentiator  | Op-amp differentiator                 |
| 6  | Inverter       | NMOS inverter with R load                      | 20 | Adder           | Op-amp adder                          |
| 7  | Inverter       | Logical inverter with NMOS and PMOS            | 21 | Subtractor      | Op-amp subtractor                     |
| 8  | Current mirror | NMOS constant current source with R load       | 22 | Schmitt trigger | Non-inverting Schmitt trigger         |
| 9  | Amplifier      | 2-stage amp. with Miller compensation          | 23 | VCO             | Voltage-controlled oscillator         |
| 10 | Amplifier      | Common-source amp. with diode-connected load   | 24 | Bandgap         | A classic brokaw bandgap reference    |
| 11 | Op-amp         | Differential op-amp with current mirror load   | 25 | Comparator      | A low offset voltage dual comparator  |
| 12 | Current mirror | Cascode current mirror                         | 26 | LDO             | 1A low dropout voltage regulator      |
| 13 | Op-amp         | Single-stage common-source op-amp with R loads | 27 | PLL             | Phase-locked loop                     |
| 14 | Op-amp         | 2-stage differential op-amp with active loads  | 28 | SAR-ADC         | Successive approximation register ADC |

Table 17: Circuit block library (two parallel lists), with column-specific background coloring(blue means simple, green means complex, red means system level)

| Models                | 1. Amplifier |      |      | 2. Amplifier |      |      | 3. Amplifier |      |      | 4. Amplifier |      |      |
|-----------------------|--------------|------|------|--------------|------|------|--------------|------|------|--------------|------|------|
|                       | p@3          | p@5  | p@10 | p@3          | p@5  | p@10 | p@3          | p@5  | p@10 | p@3          | p@5  | p@10 |
| Gemini-2.5-pro        | 1            | 1    | 1    | 1            | 1    | 1    | 0.67         | 0.67 | 0.67 | 1            | 1    | 1    |
| Gpt-4o                | 1            | 1    | 1    | 1            | 1    | 1    | 0            | 1    | 1    | 0.33         | 0.33 | 0.33 |
| Claude-3.7-sonnet     | 1            | 1    | 1    | 1            | 1    | 1    | 0.33         | 0.67 | 1    | 0.67         | 0.67 | 0.67 |
| Grok-3                | 1            | 1    | 1    | 1            | 1    | 1    | 0            | 1    | 1    | 0.67         | 0.67 | 0.67 |
| Doubao-1.5-vision-pro | 0.67         | 0.67 | 0.67 | 0.43         | 0.43 | 0.43 | 0.33         | 0.33 | 0.33 | 0.13         | 0.13 | 0.13 |
| Kimi-VL-A3B           | 0            | 0    | 0    | 0            | 0    | 0    | 0            | 0    | 0    | 0            | 0    | 0    |
| Qwen2.5-VL-72B        | 0            | 0    | 0    | 0            | 0    | 0    | 0            | 0    | 0    | 0            | 0    | 0    |

Table 18: Per-circuit pass@k scores (k = 3, 5, 10) for CKT1–CKT4 across multiple models

| Models                | 5. Amplifier |      |      | 6. Inverter |      |      | 7. Inverter |      |      | 8. Current mirror |     |      |
|-----------------------|--------------|------|------|-------------|------|------|-------------|------|------|-------------------|-----|------|
|                       | p@3          | p@5  | p@10 | p@3         | p@5  | p@10 | p@3         | p@5  | p@10 | p@3               | p@5 | p@10 |
| Gemini-2.5-pro        | 1            | 1    | 1    | 1           | 1    | 1    | 1           | 1    | 1    | 1                 | 1   | 1    |
| GPT-4o                | 1            | 1    | 1    | 1           | 1    | 1    | 1           | 1    | 1    | 1                 | 1   | 1    |
| Claude-3.7-sonnet     | 1            | 1    | 1    | 1           | 1    | 1    | 1           | 1    | 1    | 1                 | 1   | 1    |
| Grok-3                | 1            | 1    | 1    | 1           | 1    | 1    | 1           | 1    | 1    | 1                 | 1   | 1    |
| Doubao-1.5-vision-pro | 0.23         | 0.23 | 0.23 | 0.23        | 0.23 | 0.23 | 0.49        | 0.49 | 0.49 | 1                 | 1   | 1    |
| Kimi-VL-A3B           | 0            | 0    | 0    | 0           | 0    | 0    | 0           | 0    | 0    | 0                 | 0   | 0    |
| Qwen2.5-VL-72B        | 0            | 0    | 0    | 0           | 0    | 0    | 0           | 0    | 0    | 0                 | 0   | 0    |

Table 19: Per-circuit pass@k scores (k = 3, 5, 10) for CKT5–CKT8 across multiple models

| Model                 | 9. Amplifier |      |      | 10. Amplifier |      |      | 11. Op-amp |      |      | 12. Current mirror |      |      |
|-----------------------|--------------|------|------|---------------|------|------|------------|------|------|--------------------|------|------|
|                       | p@3          | p@5  | p@10 | p@3           | p@5  | p@10 | p@3        | p@5  | p@10 | p@3                | p@5  | p@10 |
| Gemini-2.5-pro        | 1            | 1    | 1    | 0.61          | 0.61 | 0.61 | 0.48       | 0.48 | 0.48 | 0.24               | 0.24 | 0.24 |
| GPT-4o                | 1            | 1    | 1    | 0.43          | 0.43 | 0.43 | 0.22       | 0.22 | 0.22 | 0                  | 0    | 0    |
| Claude-3.7-sonnet     | 1            | 1    | 1    | 0.87          | 0.87 | 0.87 | 0.65       | 0.65 | 0.65 | 0.62               | 0.62 | 0.62 |
| Grok-3                | 1            | 1    | 1    | 0.86          | 0.86 | 0.86 | 0.29       | 0.29 | 0.29 | 0.33               | 0.33 | 0.33 |
| Doubao-1.5-vision-pro | 0.27         | 0.27 | 0.27 | 0.61          | 0.61 | 0.61 | 0.33       | 0.33 | 0.33 | 0.31               | 0.31 | 0.31 |
| Kimi-VL-A3B           | 0            | 0    | 0    | 0             | 0    | 0    | 0          | 0    | 0    | 0                  | 0    | 0    |
| Qwen2.5-VL-72B        | 0            | 0    | 0    | 0             | 0    | 0    | 0          | 0    | 0    | 0                  | 0    | 0    |

Table 20: Per-circuit pass@k scores (k = 3, 5, 10) for CKT9–CKT12 across multiple models

| Model                 | 13. Op-amp |      |      | 14. Op-amp |      |      | 15. Op-amp |     |      | 16. Oscillator |     |      |
|-----------------------|------------|------|------|------------|------|------|------------|-----|------|----------------|-----|------|
|                       | p@3        | p@5  | p@10 | p@3        | p@5  | p@10 | p@3        | p@5 | p@10 | p@3            | p@5 | p@10 |
| Gemini-2.5-pro        | 0.43       | 0.43 | 0.43 | 1          | 1    | 1    | 0.33       | 0.4 | 0.1  | 0              | 0   | 0    |
| GPT-4o                | 0.32       | 0.32 | 0.32 | 0.21       | 0.21 | 0.21 | 0          | 0.2 | 0.1  | 0.33           | 0.6 | 0.3  |
| Claude-3.7-sonnet     | 1          | 1    | 1    | 0.71       | 0.71 | 0.71 | 1          | 1   | 0.9  | 0              | 0   | 0    |
| Grok-3                | 0.69       | 0.69 | 0.69 | 0.89       | 0.89 | 0.89 | 1          | 1   | 1    | 0              | 0   | 0    |
| Doubao-1.5-vision-pro | 0.68       | 0.68 | 0.68 | 0          | 0    | 0    | 0.33       | 0.2 | 0.1  | 0.33           | 0.2 | 0.1  |
| Kimi-VL-A3B           | 0          | 0    | 0    | 0          | 0    | 0    | 0          | 0   | 0    | 0              | 0   | 0    |
| Qwen2.5-VL-72B        | 0          | 0    | 0    | 0          | 0    | 0    | 0          | 0   | 0    | 0              | 0   | 0    |

Table 21: Per-circuit pass@k scores (k = 3, 5, 10) for CKT13–CKT16 across multiple models

| Model                 | 17. Oscillator |     |      | 18. Integrator |     |      | 19. Differentiator |     |      | 20. Adder |     |      |
|-----------------------|----------------|-----|------|----------------|-----|------|--------------------|-----|------|-----------|-----|------|
|                       | p@3            | p@5 | p@10 | p@3            | p@5 | p@10 | p@3                | p@5 | p@10 | p@3       | p@5 | p@10 |
| Gemini-2.5-pro        | 0              | 0   | 0    | 0.33           | 0.4 | 0.1  | 0.2                | 0.1 | 0.33 | 0.4       | 0.1 | 0.33 |
| GPT-4o                | 1              | 0.2 | 0.1  | 0.33           | 0.6 | 0.1  | 0.4                | 0.1 | 0    | 0.4       | 0.5 | 0.33 |
| Claude-3.7-sonnet     | 0.33           | 1   | 0.3  | 0.33           | 0.2 | 0.1  | 0.33               | 0.2 | 0.1  | 1         | 0.6 | 0.1  |
| Grok-3                | 0.33           | 0.6 | 0.3  | 0.67           | 0   | 0.3  | 0.67               | 0.8 | 0.1  | 0.33      | 0.4 | 0.2  |
| Doubao-1.5-vision-pro | 0.33           | 0.2 | 0.1  | 1              | 0.2 | 0.4  | 0.67               | 0.2 | 0.1  | 0.33      | 0.2 | 0.1  |
| Kimi-VL-A3B           | 0              | 0   | 0    | 0              | 0   | 0    | 0                  | 0   | 0    | 0         | 0   | 0    |
| Qwen2.5-VL-72B        | 0              | 0   | 0    | 0              | 0   | 0    | 0                  | 0   | 0    | 0         | 0   | 0    |

Table 22: Per-circuit pass@k scores (k = 3, 5, 10) for CKT17–CKT20 across multiple models

| Model                 | 21. Subtractor |     |      | 22. Schmitt trigger |      |      | 23. VCO |      |      | 24. Bandgap |     |      |
|-----------------------|----------------|-----|------|---------------------|------|------|---------|------|------|-------------|-----|------|
|                       | p@3            | p@5 | p@10 | p@3                 | p@5  | p@10 | p@3     | p@5  | p@10 | p@3         | p@5 | p@10 |
| Gemini-2.5-pro        | 0.4            | 0.1 | 0.33 | 0.33                | 0.4  | 0.1  | 0.67    | 1    | 0.9  | 0           | 0   | 0    |
| GPT-4o                | 0.6            | 0.2 | 0.33 | 0.2                 | 0.33 | 0.4  | 0.5     | 0.33 | 0.6  | 0           | 0   | 0    |
| Claude-3.7-sonnet     | 1              | 0.8 | 0.2  | 0.33                | 0.4  | 0.1  | 0.33    | 0.2  | 0.2  | 0           | 0   | 0    |
| Grok-3                | 0.33           | 0.2 | 1    | 0.33                | 0.2  | 0.1  | 0.6     | 0.5  | 0.33 | 0           | 0   | 0    |
| Doubao-1.5-vision-pro | 0.33           | 0.2 | 0.1  | 0.33                | 0.2  | 0.1  | 0.67    | 0.2  | 0.1  | 0           | 0   | 0    |
| Kimi-VL-A3B           | 0              | 0   | 0    | 0                   | 0    | 0    | 0       | 0    | 0    | 0           | 0   | 0    |
| Qwen2.5-VL-72B        | 0              | 0   | 0    | 0                   | 0    | 0    | 0       | 0    | 0    | 0           | 0   | 0    |

Table 23: Per-circuit pass@k scores (k = 3, 5, 10) for CKT21–CKT24 across multiple models

| Model                 | 25. Comparator |     |      | 26. LDO |     |      | 27. PLL |     |      | 28. SAR-ADC |     |      |
|-----------------------|----------------|-----|------|---------|-----|------|---------|-----|------|-------------|-----|------|
|                       | p@3            | p@5 | p@10 | p@3     | p@5 | p@10 | p@3     | p@5 | p@10 | p@3         | p@5 | p@10 |
| Gemini-2.5-pro        | 0              | 0   | 0    | 0       | 0   | 0    | 0       | 0   | 0    | 0           | 0   | 0    |
| GPT-4o                | 0              | 0   | 0    | 0       | 0   | 0    | 0       | 0   | 0    | 0           | 0   | 0    |
| Claude-3.7-sonnet     | 0              | 0   | 0    | 0       | 0   | 0    | 0       | 0   | 0    | 0           | 0   | 0    |
| Grok-3                | 0              | 0   | 0    | 0       | 0   | 0    | 0       | 0   | 0    | 0           | 0   | 0    |
| Doubao-1.5-vision-pro | 0              | 0   | 0    | 0       | 0   | 0    | 0       | 0   | 0    | 0           | 0   | 0    |
| Kimi-VL-A3B           | 0              | 0   | 0    | 0       | 0   | 0    | 0       | 0   | 0    | 0           | 0   | 0    |
| Qwen2.5-VL-72B        | 0              | 0   | 0    | 0       | 0   | 0    | 0       | 0   | 0    | 0           | 0   | 0    |

Table 24: Per-circuit pass@k scores (k = 3, 5, 10) for CKT25–CKT28 across multiple models

### B.3.2 TESTBENCH DESIGN TASK

| ID | Circuit Type                         | # Metrics                                        | ID | Circuit Type       | # Metrics                                                  |
|----|--------------------------------------|--------------------------------------------------|----|--------------------|------------------------------------------------------------|
| 1  | Cross-coupled differential amplifier | CMRR, DC gain, GBW, Phase margin, Power, PSR, SR | 7  | LDO                | LDR, LNR, Drop voltage, DC gain, Phase margin, PSR, Offset |
| 2  | Comparator                           | Delay, Offset                                    | 8  | VCO                | Jitter, Phase noise                                        |
| 3  | Bootstrap                            | ENOB                                             | 9  | Unit capacitor     | MC-mismatch                                                |
| 4  | Telescopic cascode OTA               | CMRR, DC gain, GBW, Phase margin, Power, PSR, SR | 10 | Folded cascode OTA | DC gain, SR, Phase margin, GBW, Power                      |
| 5  | PLL                                  | Jitter, Phase noise                              | 11 | SAR-ADC            | ENOB                                                       |
| 6  | MOS_Ron                              | Ron                                              | 12 | Bandgap            | BuildingupV, Noise, PSR, TC                                |

Table 25: Testbench design tasks with metrics to be simulated.

| Models                | 1. Cross-coupled differential amplifier |         |     |                 |       |      |    | 2. Comparator |        | 3. Boot-<br>strap |
|-----------------------|-----------------------------------------|---------|-----|-----------------|-------|------|----|---------------|--------|-------------------|
|                       | CMRR                                    | DC gain | GBW | Phase<br>margin | Power | PSR  | SR | Delay         | Offset | ENOB              |
| Gemini-2.5-pro        | 0                                       | 0       | 0   | 0               | 0     | 0    | 0  | 0             | 0      | 0                 |
| GPT-4o                | 0 (1)                                   | 0       | 0   | 0               | 0(4)  | 0(2) | 0  | 0(2)          | 0(2)   | 0                 |
| Claude-3.7-sonnet     | 0                                       | 0       | 0   | 0               | 0     | 0    | 0  | 0             | 0      | 0                 |
| Grok-3                | 0                                       | 0       | 0   | 0               | 0     | 0    | 0  | 0             | 0      | 0                 |
| Doubao-1.5-vision-pro | 0                                       | 0       | 0   | 0               | 0     | 0    | 0  | 0             | 0      | 0                 |
| Kimi-VL-A3B           | 0                                       | 0       | 0   | 0               | 0     | 0    | 0  | 0             | 0      | 0                 |
| Qwen2.5-VL-72B        | 0                                       | 0       | 0   | 0               | 0     | 0    | 0  | 0             | 0      | 0                 |

Table 26: Cross-coupled differential amplifier, Comparator, and Bootstrap Circuit Design Performance Across Different Models

| Models                | 4. Telescopic cascode OTA |         |     |                 |       |     |    | 5. PLL |                | 6. MOS_Ron |
|-----------------------|---------------------------|---------|-----|-----------------|-------|-----|----|--------|----------------|------------|
|                       | CMRR                      | DC gain | GBW | Phase<br>margin | Power | PSR | SR | Jitter | Phase<br>noise | Ron        |
| Gemini-2.5-pro        | 0                         | 0       | 0   | 0               | 0     | 0   | 0  | 0      | 0              | 0          |
| GPT-4o                | 0                         | 0       | 0   | 0               | 0     | 0   | 0  | 0      | 0              | 0          |
| Claude-3.7-sonnet     | 0                         | 0       | 0   | 0               | 0     | 0   | 0  | 0      | 0              | 0          |
| Grok-3                | 0                         | 0       | 0   | 0               | 0     | 0   | 0  | 0      | 0              | 0          |
| Doubao-1.5-vision-pro | 0                         | 0       | 0   | 0               | 0     | 0   | 0  | 0      | 0              | 0          |
| Kimi-VL-A3B           | 0                         | 0       | 0   | 0               | 0     | 0   | 0  | 0      | 0              | 0          |
| Qwen2.5-VL-72B        | 0                         | 0       | 0   | 0               | 0     | 0   | 0  | 0      | 0              | 0          |

Table 27: Telescopic cascode OTA, PLL, and MOS\_Ron Performance Across Different Models

| Models                | 7. LDO |     |              |         |              |     |        | 8. VCO |             | 9. Unit capacitor |
|-----------------------|--------|-----|--------------|---------|--------------|-----|--------|--------|-------------|-------------------|
|                       | LDR    | LNR | Drop voltage | DC gain | Phase margin | PSR | Offset | Jitter | Phase noise | MC-mismatch       |
| Gemini-2.5-pro        | 0      | 0   | 0            | 0       | 0            | 0   | 0      | 0      | 0           | 0                 |
| GPT-4o                | 0      | 0   | 0            | 0       | 0            | 0   | 0      | 0      | 0           | 0(3)              |
| Claude-3.7-sonnet     | 0      | 0   | 0            | 0       | 0            | 0   | 0      | 0      | 0           | 0                 |
| Grok-3                | 0      | 0   | 0            | 0       | 0            | 0   | 0      | 0      | 0           | 0                 |
| Doubao-1.5-vision-pro | 0      | 0   | 0            | 0       | 0            | 0   | 0      | 0      | 0           | 0                 |
| Kimi-VL-A3B           | 0      | 0   | 0            | 0       | 0            | 0   | 0      | 0      | 0           | 0                 |
| Qwen2.5-VL-72B        | 0      | 0   | 0            | 0       | 0            | 0   | 0      | 0      | 0           | 0                 |

Table 28: LDO, VCO, and Unit Capacitor Performance Across Different Models

| Models                | 10. Folded cascode OTA |    |              |     |       | 11. SAR-ADC | 12. Bandgap |       |     |    |
|-----------------------|------------------------|----|--------------|-----|-------|-------------|-------------|-------|-----|----|
|                       | DC gain                | SR | Phase margin | GBW | Power | ENOB        | BuildiupV   | Noise | PSR | TC |
| Gemini-2.5-pro        | 0                      | 0  | 0            | 0   | 0     | 0           | 0           | 0     | 0   | 0  |
| GPT-4o                | 0                      | 0  | 0            | 0   | 0     | 0           | 0           | 0(1)  | 0   | 0  |
| Claude-3.7-sonnet     | 0                      | 0  | 0            | 0   | 0     | 0           | 0           | 0     | 0   | 0  |
| Grok-3                | 0                      | 0  | 0            | 0   | 0     | 0           | 0           | 0     | 0   | 0  |
| Doubao-1.5-vision-pro | 0                      | 0  | 0            | 0   | 0     | 0           | 0           | 0     | 0   | 0  |
| Kimi-VL-A3B           | 0                      | 0  | 0            | 0   | 0     | 0           | 0           | 0     | 0   | 0  |
| Qwen2.5-VL-72B        | 0                      | 0  | 0            | 0   | 0     | 0           | 0           | 0     | 0   | 0  |

Table 29: Folded Cascode OTA, SAR-ADC, and Bandgap Performance Across Different Models



## C TEST EXAMPLES

### C.1 EXAMPLES OF PERCEPTION TASKS

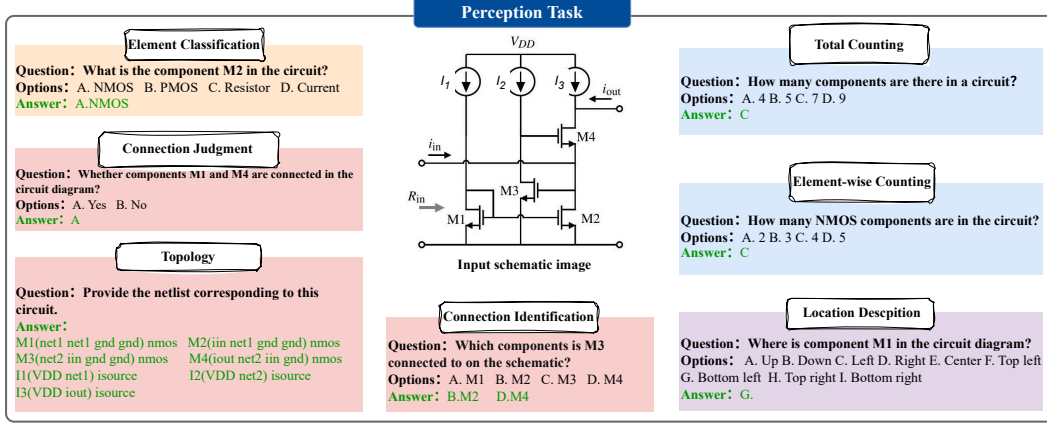Figure 7: Example of **Perception** task in AMSbench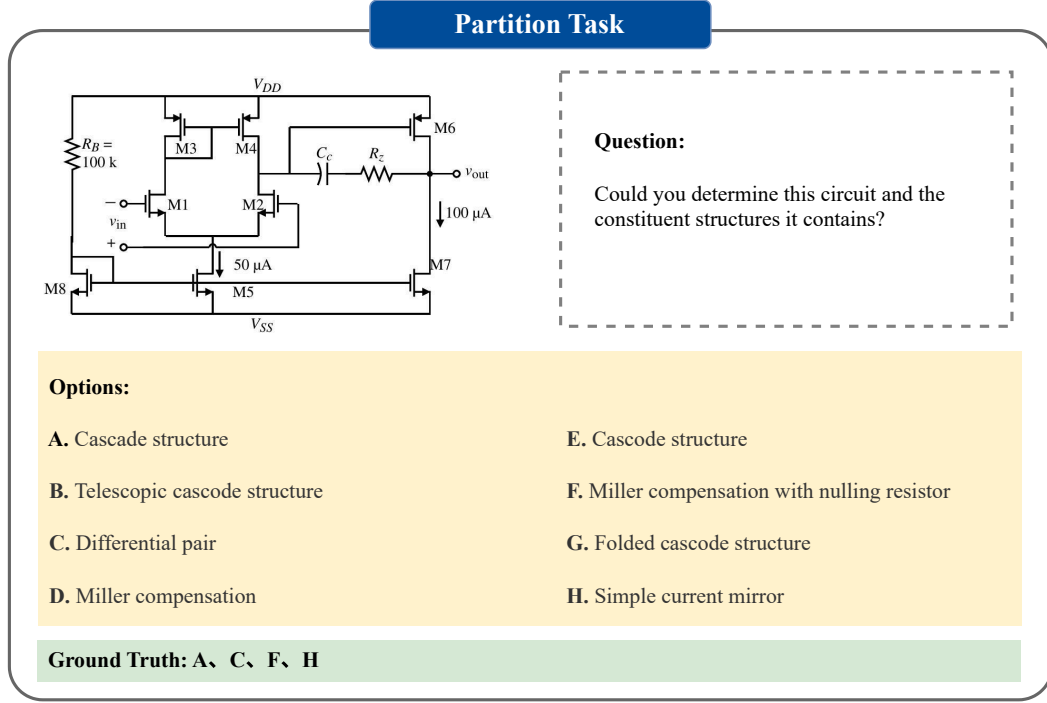Figure 8: Example of **Partition** task in AMSbench

## C.2 EXAMPLES OF ANALYSIS TASKS

**Reasoning Task**

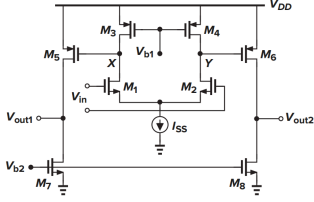

**Question:**

According to the following circuit diagram, tell me why the circuit represented by this diagram is an operational amplifier?

**Options:**

A. Through the coordination of the differential input stage, the high-gain intermediate stage and the output stage, high voltage gain and differential signal processing capabilities are achieved, which conforms to the core characteristics of an operational amplifier, namely "high gain, differential input, and signal amplification ability". Therefore, it belongs to the operational amplifier circuit.

B. This circuit does not meet the typical structural requirements of an operational amplifier: An operational amplifier usually consists of an input stage (differential amplification), a high-gain intermediate stage, and an output stage (such as a push-pull structure), and it needs to have characteristics such as high gain and frequency compensation. However, this circuit only exhibits a differential input structure (M1, M2), lacking the crucial intermediate high-gain amplification stage and the standard output stage (such as a push-pull output circuit), and it also does not have components related to frequency compensation. As a result, it cannot achieve the core functions required for an operational amplifier, such as high gain, low output impedance, and stable amplification. Therefore, it does not belong to an operational amplifier circuit.

C. An operational amplifier needs to have a complete frequency compensation mechanism to ensure the stability of the circuit (for example, by implementing phase margin adjustment through a Miller capacitor, etc.). However, this circuit has not designed any structure related to frequency compensation. It cannot effectively suppress self-excited oscillation under different input signal frequencies, nor can it ensure the stability during closed-loop operation. This is a clear deficiency compared to the stable amplification characteristics (including the stability of the frequency response) that an operational amplifier must meet. Therefore, it does not belong to an operational amplifier circuit.

D. The circuit diagram does not represent an operational amplifier because it lacks the key characteristics of an operational amplifier, such as the feedback mechanism, multi-stage amplification, and buffered output structures. Its output stage is simple and cannot achieve the high gain and stable performance required by an operational amplifier.

**Ground Truth: A**

Figure 9: Examples of Reasoning task in AMSbench

**Function Task**

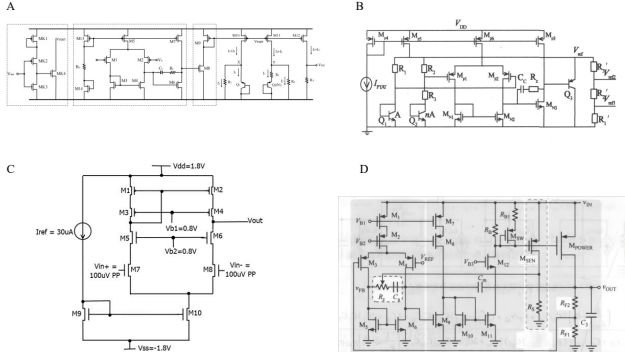

**Question:**

What is the intended function of the circuit in the diagram?

**Ground Truth: D**

Figure 10: Example of Function(image as options) task in AMSbench

**Function Task**

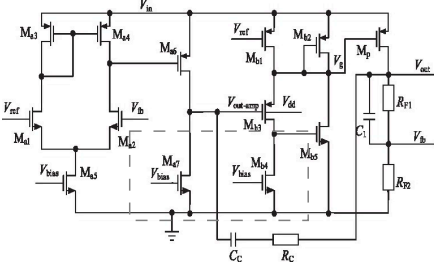

**Question:**

What is the intended function of the circuit in the diagram?

**Options:**

A. Op-amp
B. LDO .

C. Comparator
D. Bandgap .

**Ground Truth: B**

Figure 11: Example of **Function(text as options)** task in AMSbench

**Caption Task**

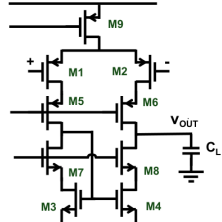

**Question:**

There is a circuit diagram below, please describe this circuit in detail.

**Options:**

A. In this folded cascode amplifier, cascode transistors M5–M8 are stacked in series with the current mirror and input devices to compensate for the low intrinsic gain of nanometer MOSFETs. The feedback loop around transistor M2 includes cascode M8, which extends the output swing by regulating the drain voltage of M2. The telescopic topology increases output impedance, thereby improving gain without affecting GBW. However, the cascode configuration necessitates a higher supply voltage to maintain proper biasing, resulting in a marginal rise in overall power dissipation.

B. The gain of this voltage amplifier is constrained by the low intrinsic gain of cascode transistors in nanometer MOSFETs. To enhance performance, four cascode devices (M5–M8) are placed in parallel with the input pair and current mirror. Cascode M5 is integrated into the feedback loop around transistor M1, which stabilizes the gain while maximizing output swing. This telescopic configuration significantly boosts both the output impedance and the gain-bandwidth product (GBW) due to improved loop gain, though the additional cascode stages introduce a slight increase in power consumption from elevated bias currents.

C. The gain of such a voltage amplifier is rather limited as the gain per transistor can be quite small for nanometer MOS devices. This is why cascodes are better added. Four cascode MOS transistors are added M5–8 in series with the input devices and current mirror, as shown in this slide. Note that cascode M7 is included in the feedback loop around transistor M3, which allows a larger output swing. This is called the telescopic CMOS OTA. The impedance at the output node increases considerably, but not the GBW.

D. This telescopic CMOS OTA addresses limited per-stage gain by incorporating cascode transistors M5–M8 in series with the differential input pair. Cascode M6 is embedded within the feedback loop surrounding transistor M4, enabling wider output swing and higher DC gain. The elevated output impedance directly enhances the GBW, as the cascodes reduce parasitic capacitance at the output node. Despite the added complexity, power consumption remains unchanged because the cascode devices operate in the saturation region without altering the bias current.

**Ground Truth: A**

Figure 12: Example of **Caption** task in AMSbench

## Electrical\_Characteristic Task

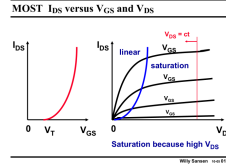

## Question:

Based on the  $I_{DS}$ - $V_{GS}$  characteristic curve on the left, what important circuit characteristic does the MOSFET's threshold voltage ( $V_T$ ) represent?

## Options:

- A. It signifies the gate-source voltage ( $V_{GS}$ ) at which the MOSFET begins to conduct current, marking the transition from off to on state.
- B. It represents the gate-source voltage ( $V_{GS}$ ) below which the drain-source current ( $I_{DS}$ ) is negligible, indicating the device is in the cut-off state.
- C. It indicates the gate-source voltage ( $V_{GS}$ ) required for the MOSFET to operate in the saturation region, where  $I_{DS}$  is largely independent of  $V_{DS}$ .
- D. It defines the maximum drain-source current ( $I_{DS}$ ) that the MOSFET can conduct when fully turned on.

Ground Truth: B

Figure 13: Example of **Electrical Characteristic** task in AMSbench

## Switching\_Timing Task

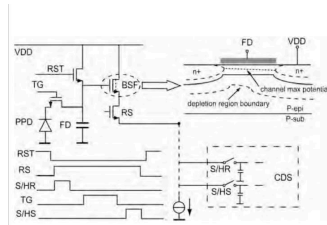

## Question:

Case (a) is preferable for applications requiring a more dynamic response, as its larger  $V_{CF}$  and  $V_{EA}$ . Based on the provided timing diagram, in the CMOS image sensor pixel readout process, the S/HR (reset sampling) pulse occurs before the TG (transfer gate) pulse, while the S/HS (signal sampling) pulse occurs after the TG pulse. What is the main purpose of this timing arrangement?

## Options:

- A. To ensure that the photodiode has completed its charge integration cycle before the signal is read out, maximizing light sensitivity.
- B. To implement Correlated Double Sampling (CDS) function, by capturing the noise and bias voltage of the Floating Diffusion (FD) node before charge transfer, and then capturing the signal plus noise level after charge transfer.
- C. To prevent charge blooming by ensuring the transfer gate is fully closed before the signal is sampled, thus maintaining pixel isolation.
- D. To optimize the pixel readout speed and reduce latency by sequentially activating the sampling switches at precise intervals.

Ground Truth: B

Figure 14: Example of **Switching Timing** task in AMSbench

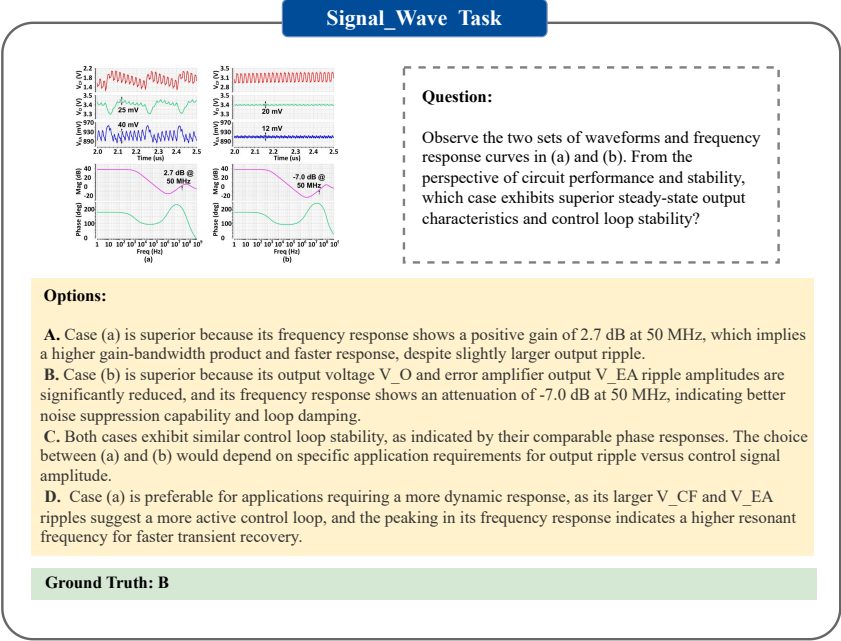

Figure 15: Example of **Signal Wave** task in AMSbench

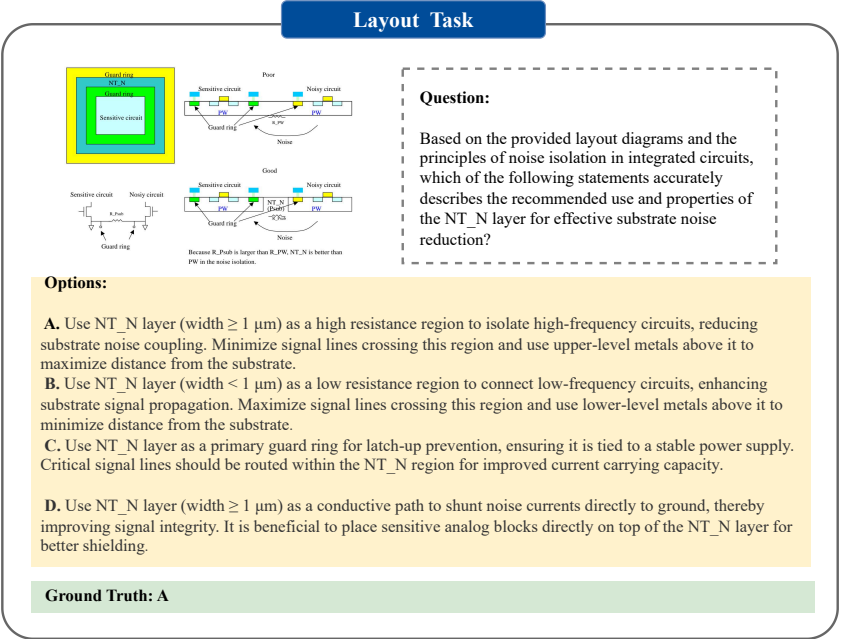

Figure 16: Example of **Layout** task in AMSbench

## C.3 EXAMPLES OF DESIGN TASKS

| User                                                                                                                                                                                                                                                                                                                                                                                                                                                                                                                                                                                                                                                                                                                                                                                                                                                                                                                                                                                                                                                                                                                                                                                                                                                                                                                                                                                                                                                                                                                                                                                                                                                                                                                                                                                                                                                                                                                                                                                                                                                                                                                                                                                                                                                                                                                                                                                                                                                                                                                                                                                                                                                                                                                                                                                                                           | Assistant (Circuit Design Prompt)                                                                                                                                                                                                                                                                                                                                                                                                                                                                                                                                                                                                                                                                                                                                                                                                                                                                                                                                                                                                                                                                                                                                                                                                                                                                                                                                                                                                                                                                                                                                                                                                                                                                                                                                                                                                                                                                                                                                                                                                                                                                                                                                                                                                                                                                                                                                         |
|--------------------------------------------------------------------------------------------------------------------------------------------------------------------------------------------------------------------------------------------------------------------------------------------------------------------------------------------------------------------------------------------------------------------------------------------------------------------------------------------------------------------------------------------------------------------------------------------------------------------------------------------------------------------------------------------------------------------------------------------------------------------------------------------------------------------------------------------------------------------------------------------------------------------------------------------------------------------------------------------------------------------------------------------------------------------------------------------------------------------------------------------------------------------------------------------------------------------------------------------------------------------------------------------------------------------------------------------------------------------------------------------------------------------------------------------------------------------------------------------------------------------------------------------------------------------------------------------------------------------------------------------------------------------------------------------------------------------------------------------------------------------------------------------------------------------------------------------------------------------------------------------------------------------------------------------------------------------------------------------------------------------------------------------------------------------------------------------------------------------------------------------------------------------------------------------------------------------------------------------------------------------------------------------------------------------------------------------------------------------------------------------------------------------------------------------------------------------------------------------------------------------------------------------------------------------------------------------------------------------------------------------------------------------------------------------------------------------------------------------------------------------------------------------------------------------------------|---------------------------------------------------------------------------------------------------------------------------------------------------------------------------------------------------------------------------------------------------------------------------------------------------------------------------------------------------------------------------------------------------------------------------------------------------------------------------------------------------------------------------------------------------------------------------------------------------------------------------------------------------------------------------------------------------------------------------------------------------------------------------------------------------------------------------------------------------------------------------------------------------------------------------------------------------------------------------------------------------------------------------------------------------------------------------------------------------------------------------------------------------------------------------------------------------------------------------------------------------------------------------------------------------------------------------------------------------------------------------------------------------------------------------------------------------------------------------------------------------------------------------------------------------------------------------------------------------------------------------------------------------------------------------------------------------------------------------------------------------------------------------------------------------------------------------------------------------------------------------------------------------------------------------------------------------------------------------------------------------------------------------------------------------------------------------------------------------------------------------------------------------------------------------------------------------------------------------------------------------------------------------------------------------------------------------------------------------------------------------|
| You are an analog integrated circuits expert.                                                                                                                                                                                                                                                                                                                                                                                                                                                                                                                                                                                                                                                                                                                                                                                                                                                                                                                                                                                                                                                                                                                                                                                                                                                                                                                                                                                                                                                                                                                                                                                                                                                                                                                                                                                                                                                                                                                                                                                                                                                                                                                                                                                                                                                                                                                                                                                                                                                                                                                                                                                                                                                                                                                                                                                  |                                                                                                                                                                                                                                                                                                                                                                                                                                                                                                                                                                                                                                                                                                                                                                                                                                                                                                                                                                                                                                                                                                                                                                                                                                                                                                                                                                                                                                                                                                                                                                                                                                                                                                                                                                                                                                                                                                                                                                                                                                                                                                                                                                                                                                                                                                                                                                           |
| Assistant (Circuit Design Prompt)                                                                                                                                                                                                                                                                                                                                                                                                                                                                                                                                                                                                                                                                                                                                                                                                                                                                                                                                                                                                                                                                                                                                                                                                                                                                                                                                                                                                                                                                                                                                                                                                                                                                                                                                                                                                                                                                                                                                                                                                                                                                                                                                                                                                                                                                                                                                                                                                                                                                                                                                                                                                                                                                                                                                                                                              |                                                                                                                                                                                                                                                                                                                                                                                                                                                                                                                                                                                                                                                                                                                                                                                                                                                                                                                                                                                                                                                                                                                                                                                                                                                                                                                                                                                                                                                                                                                                                                                                                                                                                                                                                                                                                                                                                                                                                                                                                                                                                                                                                                                                                                                                                                                                                                           |
| <p>You aim to design a topology for a given circuit described in the text. Please ensure your designed circuit topology works properly and achieves the design requirements.</p> <p>Here is an example:</p> <p><b>Question:</b><br/>Design a 2-stage amplifier (first stage: a common-source stage with current-source load, second stage: a common-source stage with resistor load).</p> <p>Input node name: Vin, Vbias.</p> <p>Output node name: Vout.</p> <p><b>Answer:</b></p> <p><b>Task 1</b></p> <p><b>Components Needed</b></p> <ul style="list-style-type: none"> <li>- <b>NMOS Transistors:</b> M1 and M3</li> <li>- <b>PMOS Transistors:</b> M2 (used as the current source in the first stage)</li> <li>- <b>Resistors:</b> R1 for the second stage load</li> <li>- <b>Power Supply:</b> Vdd for DC supply</li> <li>- <b>Input Signal Source:</b> Vin, Vbias for biasing and signal input</li> <li>- <b>Capacitors:</b> Not specified but can be included for coupling and bypass applications if required</li> </ul> <p><b>Stage 1: Common-Source Amplifier with Current Source Load</b></p> <ol style="list-style-type: none"> <li><b>Transistor Setup:</b> <ul style="list-style-type: none"> <li>- <b>M1</b>(NMOS) as the main amplifying transistor.</li> <li>- Gate of <b>M1</b> is connected to the input node <b>Vin</b>.</li> <li>- Source of <b>M1</b> connected to the ground.</li> <li>- Drain of <b>M1</b> connected to the drain of <b>M2</b>.</li> </ul> </li> <li><b>Biasing:</b> <ul style="list-style-type: none"> <li>- <b>Vin</b> provides the input signal.</li> <li>- <b>Vbias</b> is used to bias <b>M2</b> (PMOS), ensuring it operates as a current source.</li> </ul> </li> <li><b>Current Source Load (M2):</b> <ul style="list-style-type: none"> <li>- <b>M2</b>, a PMOS transistor, is configured as a current source.</li> <li>- The source of <b>M2</b> is connected to <b>Vdd</b>, and its gate is connected to <b>Vbias</b>.</li> <li>- Drain of <b>M2</b> is connected to the drain of <b>M1</b>, providing a high-impedance load.</li> </ul> </li> </ol> <p><b>Stage 2: Common-Source Amplifier with Resistor Load</b></p> <ol style="list-style-type: none"> <li><b>Transistor Setup:</b> <ul style="list-style-type: none"> <li>- <b>M3</b> (NMOS) as the main amplifying transistor for the second stage.</li> <li>- Gate of <b>M3</b> connected to the drain of <b>M1</b>.</li> <li>- Source of <b>M3</b> connected to the ground.</li> <li>- Drain of <b>M3</b> connected to <b>Vout</b> through resistor <b>R1</b>.</li> </ul> </li> <li><b>Load and Coupling:</b> <ul style="list-style-type: none"> <li>- <b>R1</b> connects the drain of <b>M3</b> to <b>Vdd</b>. This resistor converts the current through <b>M3</b> into an output voltage.</li> </ul> </li> </ol> | <p><b>Task 2</b></p> <pre>from PySpice.Spice.Netlist import Circuit from PySpice.Unit import *</pre> <pre>circuit = Circuit('Two-Stage Amplifier') # Define the MOSFET models circuit.model('nmos_model', 'nmos', level=1, kp=100e-6, vto=0.5) circuit.model('pmos_model', 'pmos', level=1, kp=50e-6, vto=-0.5)  # Power Supplies for the power and input signal  circuit.V('dd', 'Vdd', circuit.gnd, 5.0) # 5V power supply circuit.V('in', 'Vin', circuit.gnd, 1.0) # 1V input for bias voltage circuit.V('bias', 'Vbias', circuit.gnd, 4.0) # 4V input for bias voltage  # First Stage: Common-Source with Active Load # parameters: name, drain, gate, source, bulk, model, w, l circuit.MOSFET('I1', 'Drain1', 'Vin', circuit.gnd, circuit.gnd, model='nmos_model', w=50e-6, l=1e-6) circuit.MOSFET('2', 'Drain1', 'Vbias', 'Vdd', 'Vdd', model='pmos_model', w=100e-6, l=1e-6)  # Second Stage: Common-Source with Resistor Load circuit.MOSFET('3', 'Vout', 'Drain1', circuit.gnd, circuit.gnd, model='nmos_model', w=100e-6, l=1e-6) circuit.R('1', 'Vout', 'Vdd', 1@u_kΩ)  # Analysis Part simulator = circuit.simulator()  As you have seen, the output of your designed topology should consist of two tasks: 1. Give a detailed design plan about all devices and their interconnectivity nodes and properties. 2. Write a complete Python code, describing the topology of integrated analog circuits according to the design plan.  Please make sure your Python code is compatible with PySpice. Please give the runnable code without any placeholders. Do not write other redundant codes after 'simulator = circuit.simulator()'.  There are some tips you should remember all the time: 1. For the MOSFET definition circuit.MOSFET(name, drain, gate, source, bulk, model, w=w1,l=l1), be careful about the parameter sequence. 2. You should connect the bulk of a MOSFET to its source. 3. Please use the MOSFET threshold voltage, when setting the bias voltage. 4. Avoid giving any AC voltage in the sources, just consider the operating points. 5. Make sure the input and output node names appear in the circuit. 6. Avoid using subcircuits. 7. Use nominal transistor sizing. 8. Assume the Vdd = 5.0 V.  <b>Question:</b><br/>Design [TASK].<br/>Input node name: [INPUT].<br/>Output node name: [OUTPUT].  <b>Answer:</b> (.....)</pre> |

Figure 17: Prompt of Circuit Design task in AMSbench

1458  
1459  
1460  
1461  
1462  
1463  
1464  
1465  
1466  
1467  
1468  
1469  
1470  
1471  
1472  
1473  
1474  
1475  
1476  
1477  
1478  
1479  
1480  
1481  
1482  
1483  
1484  
1485  
1486  
1487  
1488  
1489  
1490  
1491  
1492  
1493  
1494  
1495  
1496  
1497  
1498  
1499  
1500  
1501  
1502  
1503  
1504  
1505  
1506  
1507  
1508  
1509  
1510  
1511

| User                                                                                                                                                                                                                                                                                                                                                                                                                                                                                                                                                                                                                                                                                                                                                                                                                                                                                                                                                                                                                                                                                                                                                                                                                                                                                                                                                                           |
|--------------------------------------------------------------------------------------------------------------------------------------------------------------------------------------------------------------------------------------------------------------------------------------------------------------------------------------------------------------------------------------------------------------------------------------------------------------------------------------------------------------------------------------------------------------------------------------------------------------------------------------------------------------------------------------------------------------------------------------------------------------------------------------------------------------------------------------------------------------------------------------------------------------------------------------------------------------------------------------------------------------------------------------------------------------------------------------------------------------------------------------------------------------------------------------------------------------------------------------------------------------------------------------------------------------------------------------------------------------------------------|
| You are an analog integrated circuits expert.                                                                                                                                                                                                                                                                                                                                                                                                                                                                                                                                                                                                                                                                                                                                                                                                                                                                                                                                                                                                                                                                                                                                                                                                                                                                                                                                  |
| Assistant (Testbench Design Prompt)                                                                                                                                                                                                                                                                                                                                                                                                                                                                                                                                                                                                                                                                                                                                                                                                                                                                                                                                                                                                                                                                                                                                                                                                                                                                                                                                            |
| <p>You are an analog circuit design engineer with over 10 years of experience, familiar with the Cadence Spectre simulation environment, CMOS circuit modeling, and various circuit performance testing methods.</p> <p>I will provide a netlist file and schematic diagram of a "certain circuit" (given in both text and image formats). Based on the netlist file, please write a complete Spectre simulation input file (.cir format) to test the "certain performance" of the circuit, while keeping the core structure of the circuit unchanged.</p> <p><b>Requirements:</b></p> <p>Add the necessary excitation sources (such as voltage sources, current sources, etc.) and appropriate simulation analysis statements (such as ac, dc, tran, noise, etc.) to test the target performance.</p> <p>The generated .cir file should be directly runnable in Spectre without any additional modifications.</p> <p>Briefly explain your test configuration approach (including input signals, biasing methods, load, power supply, etc.).</p> <p><b>Please output exactly five separate Spectre testbench code blocks. Each block must be wrapped in triple backticks, like:</b></p> <pre>// testbench #1 ... // testbench #2 ...</pre> <p><b>The example of the writing format of the testbench is referred to as follows:</b></p> <pre>&lt;testbench_format.cir&gt;</pre> |

Figure 18: Prompt of **Testbench Design** task in AMSbench

## D CASE STUDY

### D.1 PERCEPTION TASK FOR ERROR ANALYSIS

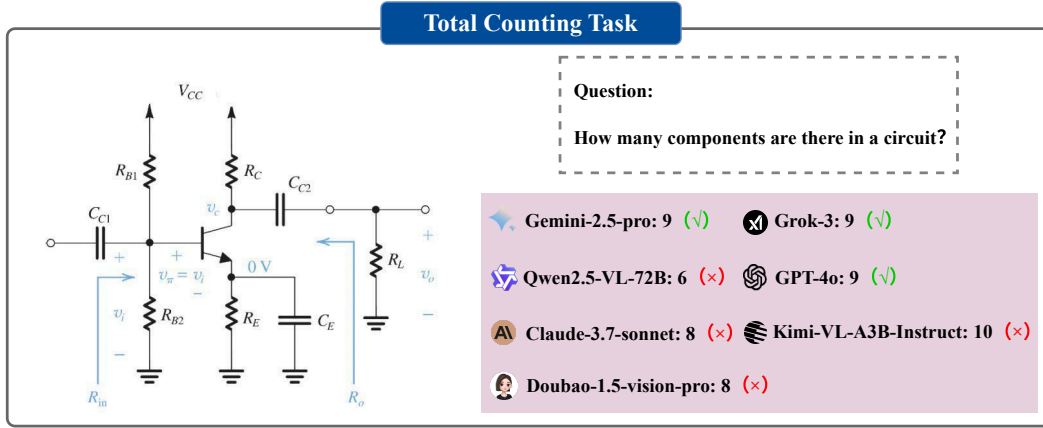

Figure 19: Example of **Total Counting** task across models

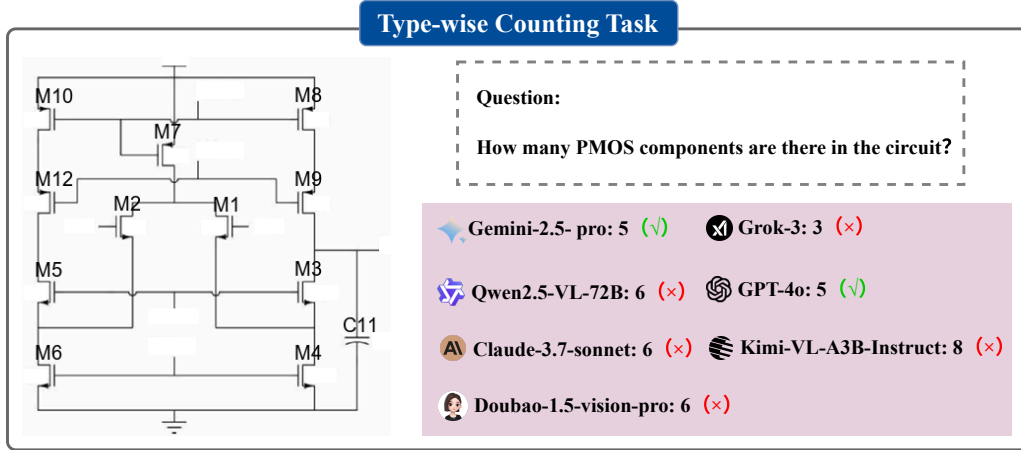

Figure 20: Example of **Type-wise Counting** task across models



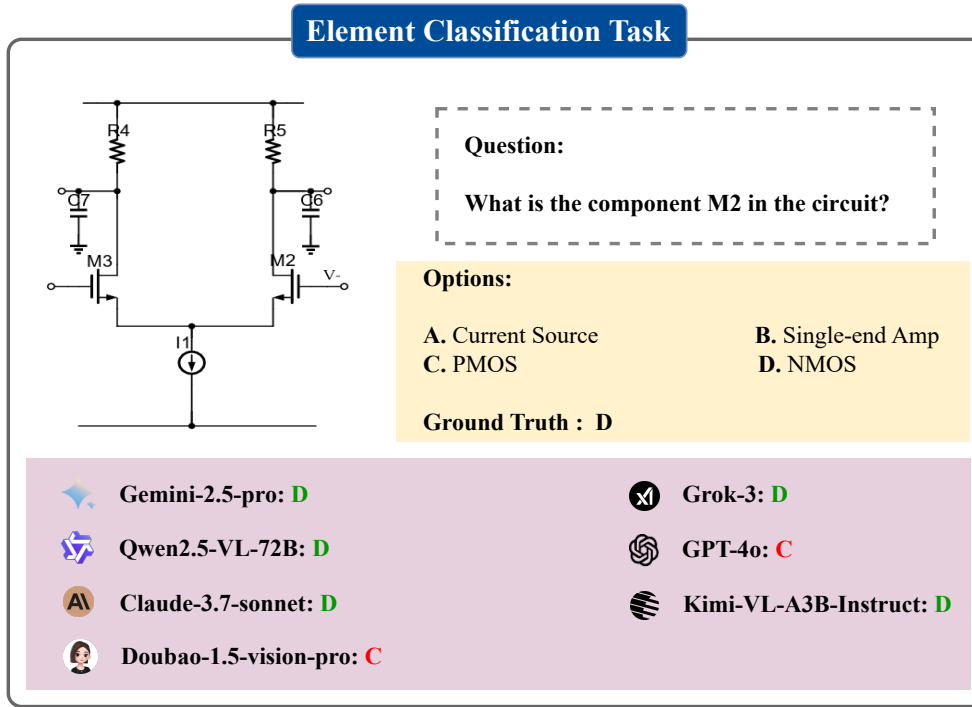Figure 21: Example of **Element Classification** task across models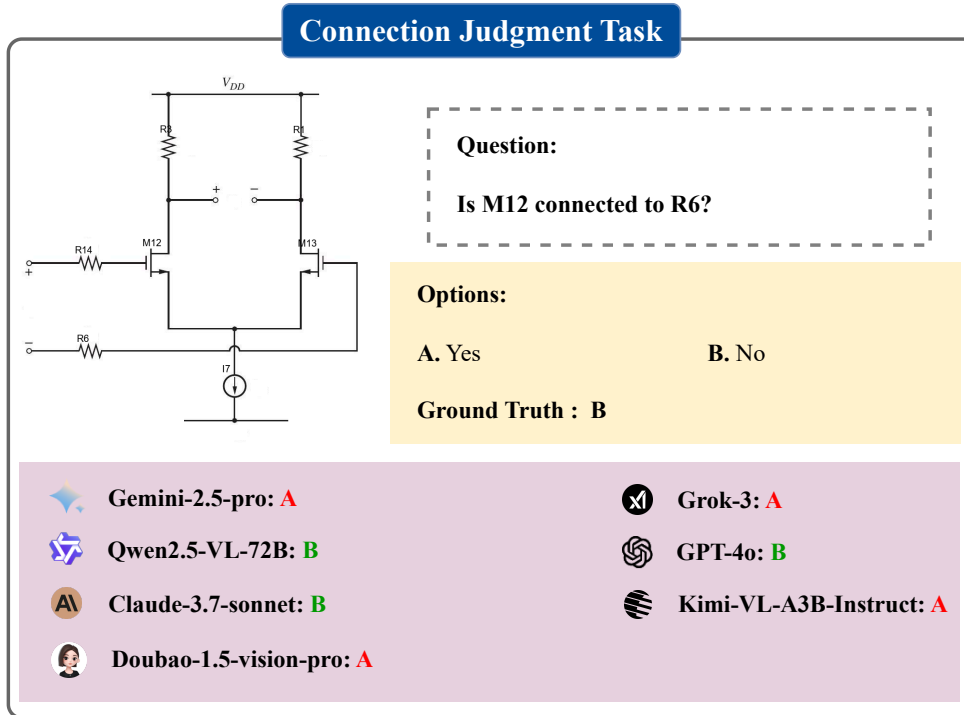Figure 22: Example of **Connection Judgment** task across models

## Connection Identification Task

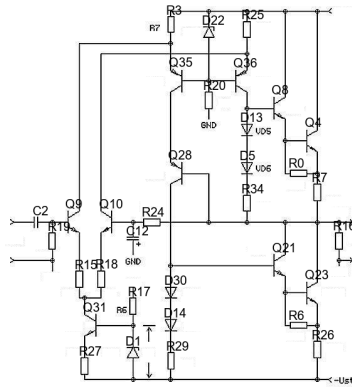

**Question:**

### Which components is R15 connected to?

**Options:**

- A. "Q9"  
C. "C2"  
E. "Q31"  
G. "R18"
- B. "R3"  
D. "Q28"  
F. "R17"  
H. "R15"

**Ground Truth : A, E, G**

✨ Gemini-2.5-pro: A、E、G

🔗 Grok-3: A、G

 Qwen2.5-VL-72B: **G** GPT-4o: **B**、**F**、**G**

**A) Claude-3.7-sonnet: A, E, G**

 Doubao-1.5-vision-pro: **A**、**E**、**G**

 **Kimi-VL-A3B-Instruct: A, D, E, F, G, H**Figure 23: Example of **Connection Identification** task across models

## Locaiton Description Task

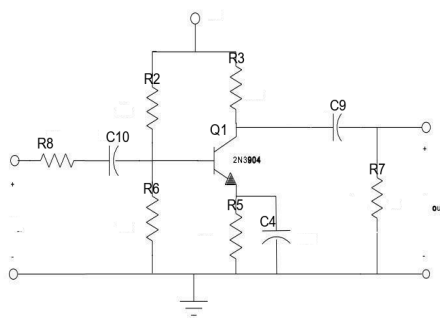

**Question:**

**What part of the circuit does the C4 occupy?**

**Options:**

- A.** Bottom  
**B.** Center  
**C.** Bottom Left  
**D.** Right  
**E.** Top right  
**F.** Left  
**G.** Top left  
**H.** Top  
**I.** Bottom right  
**Ground Truth : A**

🌟 Gemini-2.5-pro: I

❧ Grok-3: A

 Qwen2.5-VL-72B: **A** **GPT-4o: C**

**AI Claude-3.7-sonnet: I**

 **Doubao-1.5-vision-pro: B**

 **Kimi-VL-A3B-Instruct: C**Figure 24: Example of **Location Description** task across models

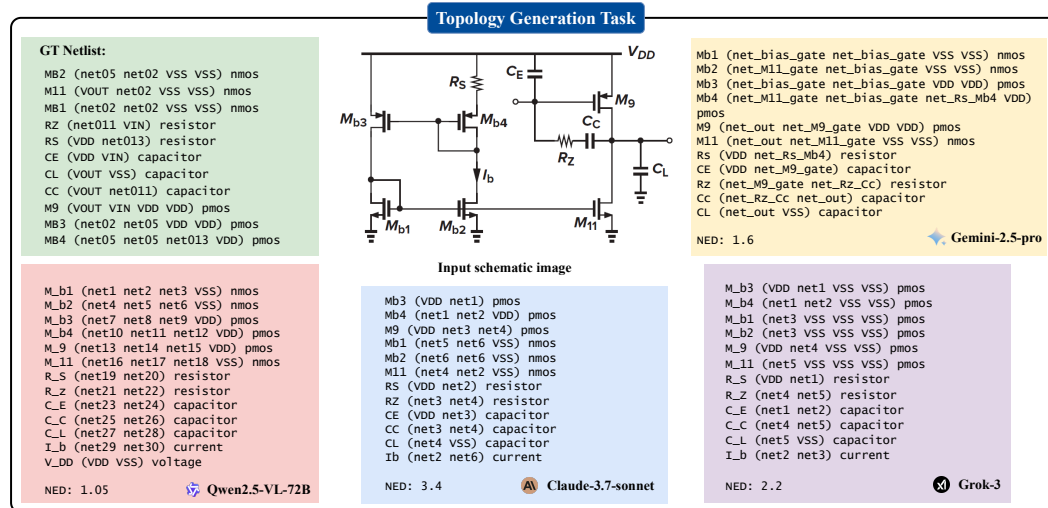Figure 25: Example of **Topology Generation** task across models

## D.2 ANALYSIS TASK FOR ERROR ANALYSIS

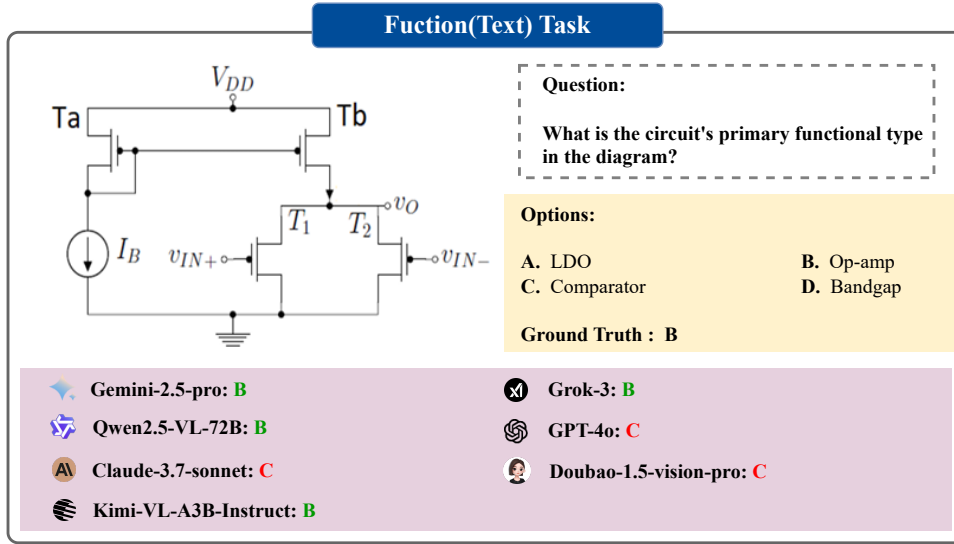Figure 26: Example of **Function Text** task across models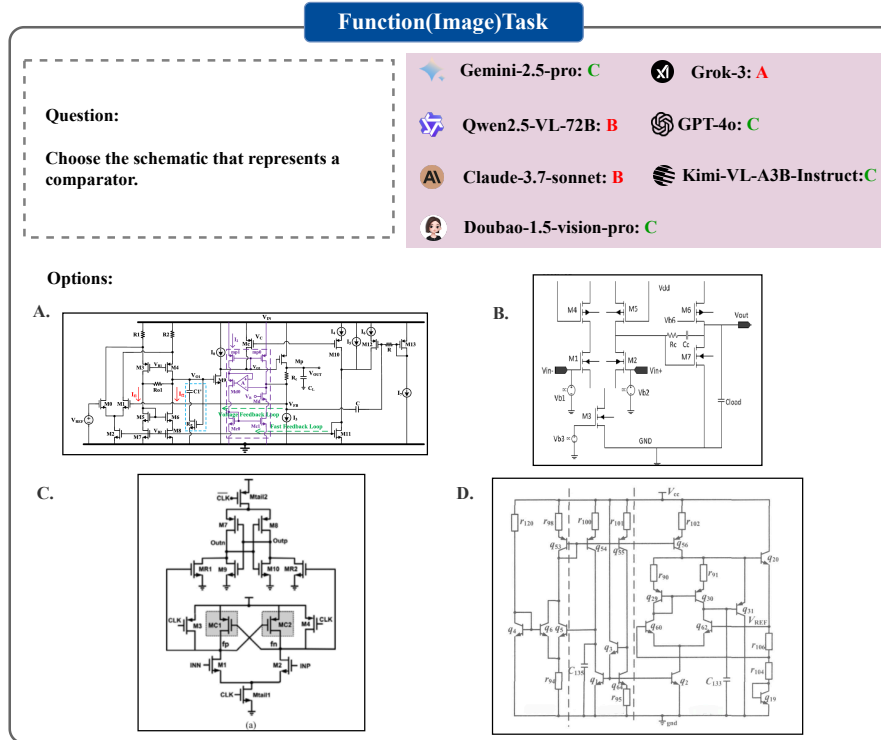Figure 27: Example of **Function Image** task across models

Partition Task

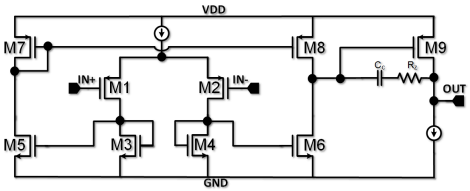

**Question:**

Which structural elements does the circuit include?

**Options:**

A. Diode-connected load

B. Wilson current mirror

C. Cascode current mirror

D. Source degenerated differential pair

E. Active load(current mirror load) .

F. Differential pair .

G. Simple current mirror.

H. Common-source amplifier .

**Groud Truth: A、 E、 F、 G、 H**

 Gemini-2.5-pro: **E、 F、 G、 H**

 Qwen2.5-VL-72B: **A、 C、 D、 E**

 Claude-3.7-sonnet: **C、 F**

 Doubao-1.5-vision-pro: **E、 F**

 Grok-3: **E、 F**

 GPT-4o: **E、 F、 H**

 Kimi-VL-A3B-Instruct: **D**

Figure 28: Example of **Partition Identification** task across models

What distinguishes this circuit as an operational amplifier in the given diagram?

This circuit qualifies as an operational amplifier because: The circuit includes a differential input stage formed by transistors Mn1 and Mn2, which is a fundamental feature of any operational amplifier. These transistors receive differential signals at their gates (VIN+ and VIN-), enabling differential signal amplification. Tail current sources are implemented using transistors Mp1 and Mp2, which help set a proper operating point for Mp3-Mp4. The transistors Mn3-Mn6 form a cascode current source, indicated by the bias voltage Vb2 and Vb5, which can increase output impedance. A gain stage is formed by transistors Mn5 and Mn6, which further amplify the signal. The outputs VO1 and VO2 suggest a differential output configuration, which is common in fully differential op-amp designs. Multiple bias voltages (Vb1, Vb2, Vb3, Vb4, and Vb5) are used to properly bias various stages of the circuit, which is a typical approach in analog integrated op-amp design to maintain correct operating points.

The circuit is an operational amplifier primarily due to its differential pair M<sub>n1</sub> and M<sub>n2</sub>, which amplify the input voltage difference through a resistive load formed by M<sub>p3</sub> and M<sub>p4</sub>. A current source at the tail of the input stage, implemented by M<sub>n5</sub> and M<sub>n6</sub> under V<sub>b2</sub> control, sets the quiescent current. The cascode stage M<sub>p1</sub> and M<sub>p2</sub> provides voltage gain by stacking transistors, while M<sub>p5</sub> and M<sub>p6</sub> serve as active loads for the output stage, producing the differential outputs VO1 and VO2. The bias voltages (V<sub>b1</sub>–V<sub>b5</sub>) are critical for adjusting the transconductance of the input stage and tuning the cascode's gain, which aligns with conventional op-amp architectures that prioritize high open-loop gain and differential signal processing. (x)

This circuit qualifies as an operational amplifier because: The circuit includes a differential input stage formed by transistors Mm1 and Mm2, which is a fundamental feature of any operational amplifier. These transistors receive differential signals at their gates (VIN+ and VIN-), enabling differential signal amplification. Tail current sources are implemented using transistors Mp1 and Mp2, which help to set a proper operating point for Mp3-Mp4. The transistors Mn3-Mn6 form a cascode current source, indicated by the bias voltage Vb2 and Vb5, which can increase output impedance. A gain stage is built with transistors Mp3, Mp4, which function as a cascode and further amplify the signal. The outputs VO1 and VO2 suggest a differential output configuration, which is common in fully differential op-amp designs. Multiple bias voltages (Vb1, Vb2, Vb3, Vb4, and Vb5) are used to properly bias various stages of the circuit, which is a typical approach in analog integrated op-amp design to maintain correct operating points. (✓)

This circuit qualifies as an operational amplifier because: The circuit includes a differential input stage formed by transistors M1 and M2, which is a fundamental feature of any operational amplifier. These transistors receive differential signals at their gates (VIN+ and VIN-), enabling differential signal amplification. Tail current sources are implemented using transistors Mp1 and Mp2, which help to set a proper operating point for Mp3-Mp4. The transistors Mn3-Mn6 form a cascode current source, indicated by the bias voltage Vb2 and Vb5, which can increase output impedance. A gain stage is built with transistors Mp3, Mp4, which function as a cascode and further amplify the signal. The outputs VO1 and VO2 suggest a differential output configuration, which is common in fully differential op-amp designs. Multiple bias voltages (Vb1, Vb2, Vb3, Vb4, and Vb5) are used to properly bias various stages of the circuit, which is a typical approach in analog integrated op-amp design to maintain correct operating points. (v)

This circuit qualifies as an operational amplifier because: The circuit includes a differential input stage formed by transistors Mn1 and Mn2, which is a fundamental feature of any operational amplifier. These transistors receive differential signals at their gates (VIN+ and VIN-), enabling differential signal amplification. Tail current sources are implemented using transistors Mp1 and Mp2, which help to set a proper operating point for Mp3-Mp4. The transistors Mn3-Mn6 form a cascode current source, indicated by the bias voltage Vb2 and Vb5, which can increase output impedance. A gain stage is built with transistors Mp3, Mp4, which function as a cascode and further amplify the signal. The outputs VO1 and VO2 suggest a differential output configuration, which is common in fully differential op-amp designs. Multiple bias voltages (Vb1, Vb2, Vb3, Vb4, and Vb5) are used to properly bias various stages of the circuit, which is a typical approach in analog integrated op-amp design to maintain correct operating points. (v)

The circuit is an operational amplifier primarily due to its differential pair Mn1 and Mn2, which amplify the input voltage difference through a resistive load formed by Mp3 and Mp4. A current source at the tail of the input stage, implemented by Mn5 and Mn6 under Vb2 control, sets the quiescent current. The cascode stage Mp1 and Mp2 provides voltage gain by stacking transistors, while Mp5 and Mp6 serve as active loads for the output stage, producing the differential outputs VO1 and VO2. The bias voltages (Vb1–Vb5) are critical for adjusting the transconductance of the input stage and tuning the cascode's gain, which aligns with conventional op-amp architectures that prioritize high open-loop gain and differential signal processing. (x)

The circuit is an operational amplifier primarily due to its differential pair Mn1 and Mn2, which amplify the input voltage difference through a resistive load formed by Mp3 and Mp4. A current source at the tail of the input stage, implemented by Mn5 and Mn6 under Vb2 control, sets the quiescent current. The cascode stage Mp1 and Mp2 provides voltage gain by stacking transistors, while Mp5 and Mp6 serve as active loads for the output stage, producing the differential outputs VO1 and VO2. The bias voltages (Vb1–Vb5) are critical for adjusting the transconductance of the input stage and tuning the cascode's gain, which aligns with conventional op-amp architectures that prioritize high open-loop gain and differential signal processing. (x)

This circuit qualifies as an operational amplifier because: The circuit includes a differential input stage formed by transistors Mm1 and Mm2, which is a fundamental feature of any operational amplifier. These transistors receive differential signals at their gates (VIN+ and VIN-), enabling differential signal amplification. Tail current sources are implemented using transistors Mp1 and Mp2, which help to set a proper operating point for Mp3-Mp4. The transistors Mn3-Mn6 form a cascode current source, indicated by the bias voltage Vb2 and Vb5, which can increase output impedance. A gain stage is built with transistors Mp3, Mp4, which function as a cascode and further amplify the signal. The outputs VO1 and VO2 suggest a differential output configuration, which is common in fully differential op-amp designs. Multiple bias voltages (Vb1, Vb2, Vb3, Vb4, and Vb5) are used to properly bias various stages of the circuit, which is a typical approach in analog integrated op-amp design to maintain correct operating points. (v)

35

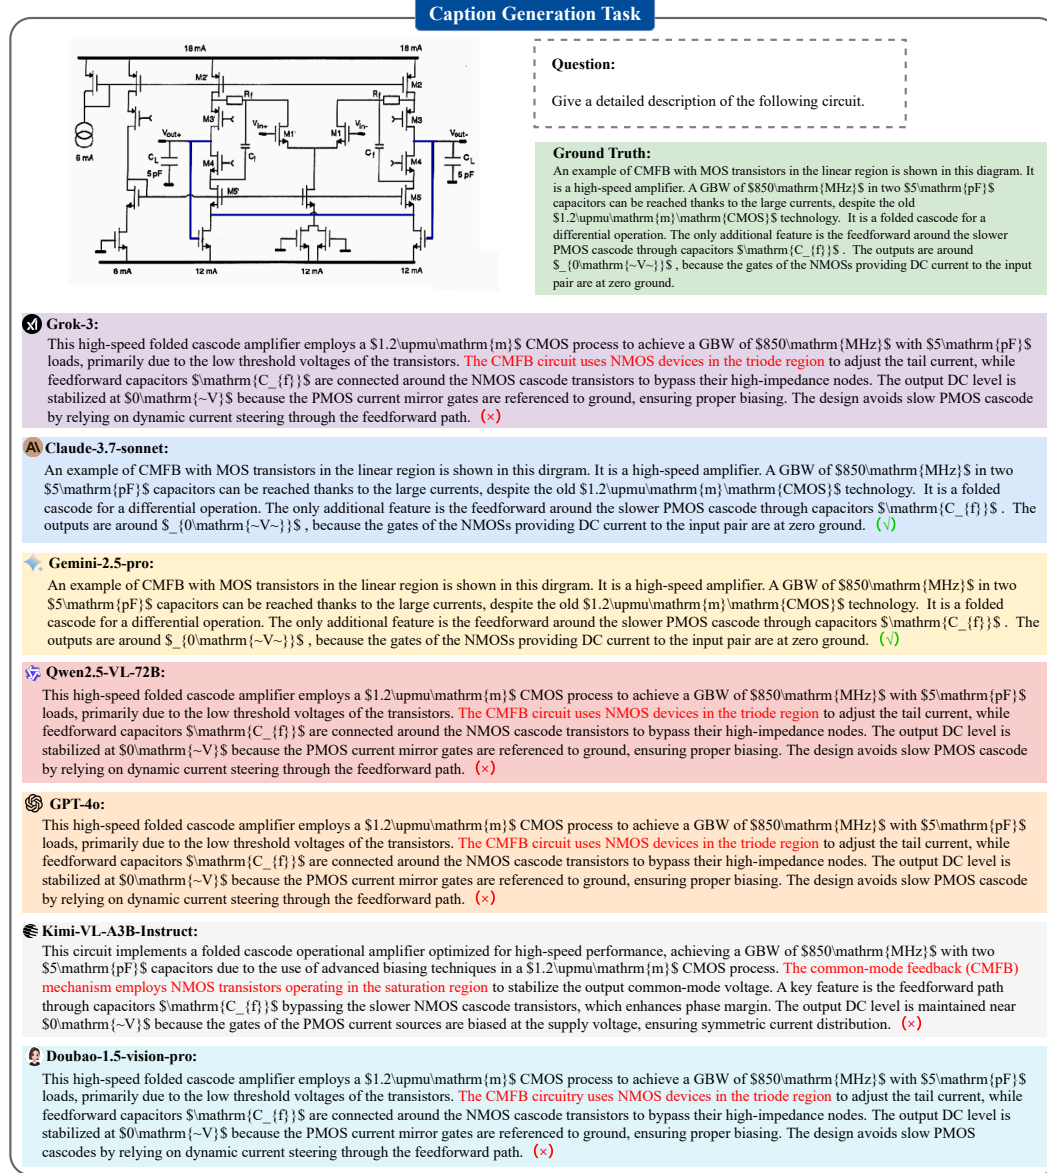

Figure 30: Example of Caption Generation task across models

1944  
1945  
1946  
1947  
1948  
1949  
1950  
1951  
1952  
1953  
1954  
1955  
1956  
1957  
1958  
1959  
1960  
1961  
1962  
1963  
1964  
1965  
1966  
1967  
1968  
1969  
1970  
1971  
1972  
1973  
1974  
1975  
1976  
1977  
1978  
1979  
1980  
1981  
1982  
1983  
1984  
1985  
1986  
1987  
1988  
1989  
1990  
1991  
1992  
1993  
1994  
1995  
1996  
1997

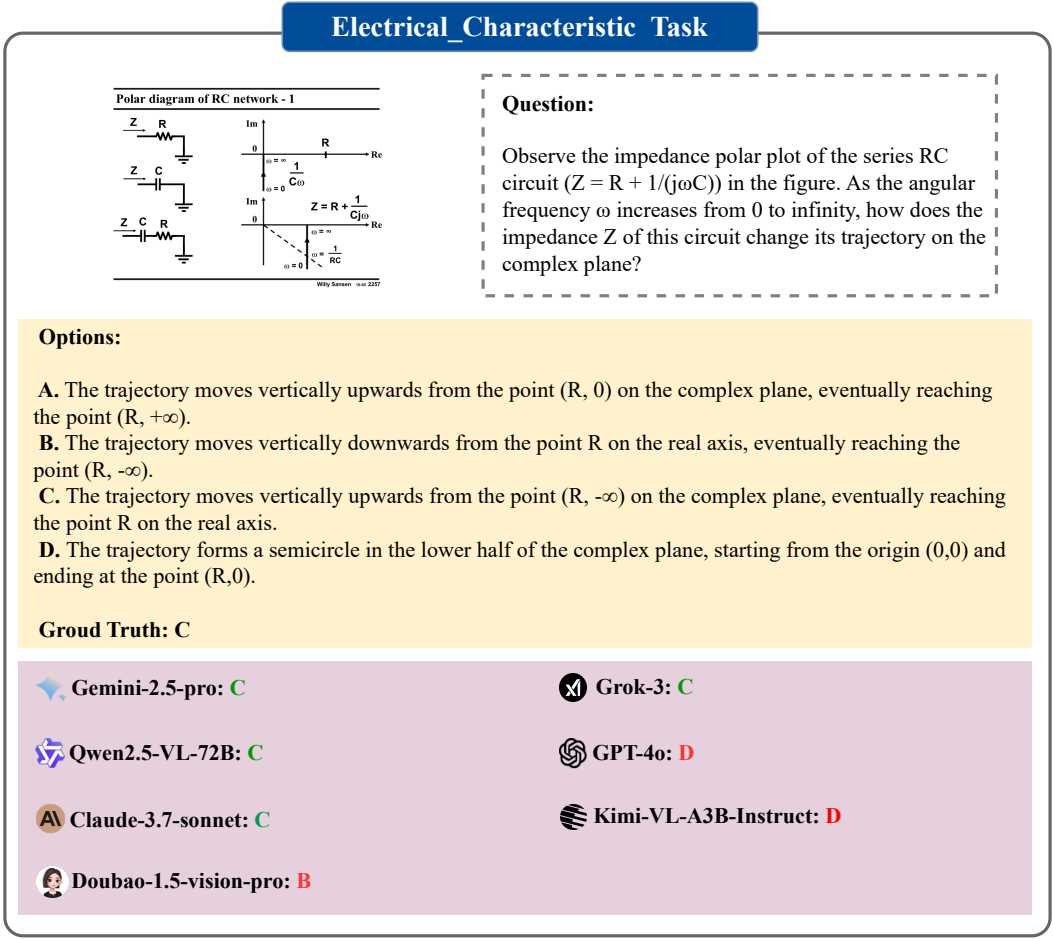

Figure 31: Example of **ElectricalCharacteristic** task across models



1998  
1999  
2000  
2001  
2002  
2003  
2004  
2005  
2006  
2007  
2008  
2009  
2010  
2011  
2012  
2013  
2014  
2015  
2016  
2017  
2018  
2019  
2020  
2021  
2022  
2023  
2024  
2025  
2026  
2027  
2028  
2029  
2030  
2031  
2032  
2033  
2034  
2035  
2036  
2037  
2038  
2039  
2040  
2041  
2042  
2043  
2044  
2045  
2046  
2047  
2048  
2049  
2050  
2051

### Signal Wave Task

40mV 1.8µs 40mV 2µs/div V<sub>O</sub> 420mA 20mA I<sub>LOAD</sub>

**Question:**

Based on the provided waveform plot, what is the peak-to-peak output voltage deviation observed for this voltage regulator during load transient changes?

**Options:**

- A. 40mV.
- B. 80mV.
- C. 20mV.
- D. 60mV.

**Ground Truth: B**

Gemini-2.5-pro: **B**

Grok-3: **A**

Qwen2.5-VL-72B: **B**

GPT-4o: **A**

Claude-3.7-sonnet: **B**

Kimi-VL-A3B-Instruct: **A**

Doubao-1.5-vision-pro: **B**

Figure 32: Example of **Signal Wave** task across models

## Switch Timing Task

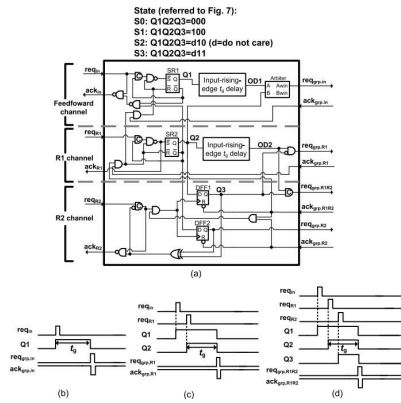

### Question:

In timing diagrams (b), (c), and (d), the delay labeled  $t_g$  exists between the rising edge of signals  $Q1$ ,  $Q2$ , or  $Q3$  and the rising edge of their corresponding  $req_{grp}$  signals (e.g.,  $req_{grp} \in$ ,  $req_{grp} \cdot R1$ , or  $req_{grp} \cdot R1R2$ ). Analyzing circuit diagram (a), what role does this  $t_g$  delay play in the circuit?

### Options:

- A. It signifies the delay from the rising edge of the input request signal ( $req_{in}$ ,  $req_{R1}$ ,  $req_{R2}$ ) until the internal state signals ( $Q1$ ,  $Q2$ ,  $Q3$ ) begin to change.
- B. It represents the inherent processing delay required for the circuit to generate the external request signal after the internal state signals ( $Q1$ ,  $Q2$ ,  $Q3$ ) have stabilized.
- C. It is merely the cumulative propagation delay of the combinational logic gates (OD1, OD2, and others) that directly follow the  $Q$  signals to produce the  $req_{grp}$  outputs.
- D. It is a fixed delay added to prevent race conditions between the  $req_{grp}$  signals and their corresponding  $ack_{grp}$  signals in the handshake protocol.

**Ground Truth: B**

🌟 Gemini-2.5-pro: **B**

🌟 Grok-3: **B**

🌟 Qwen2.5-VL-72B: **B**

🌟 GPT-4o: **B**

🌟 Claude-3.7-sonnet: **C**

🌟 Kimi-VL-A3B-Instruct: **A**

🌟 Doubao-1.5-vision-pro: **C**

Figure 33: Example of **Switching Timing** task across models

Layout Task

**Question:**

The provided image illustrates a common Design Rule Check (DRC) principle applied to OPC (Optical Proximity Correction) layers in integrated circuit layout. Based on the visual examples and typical DRC considerations for manufacturability, which of the following statements accurately describes a forbidden geometric configuration for these layers??

**Options:**

- A. For the OPC layers, any edge of length  $< 1.0 \times$  minimum width must be adjacent to an edge of length greater than  $1.0 \times$  minimum width.
- B. For the OPC layers, any edge of length  $< 1.0 \times$  minimum width cannot have another adjacent edge of length  $< 1.0 \times$  minimum width.
- C. For the OPC layers, any edge of length  $< 1.0 \times$  minimum width cannot have more than one adjacent edge of length  $< 1.0 \times$  minimum width.
- D. For the OPC layers, any edge of length  $< 1.0 \times$  minimum width cannot have another adjacent edge of length equal to or greater than  $1.0 \times$  minimum width.

**Ground Truth: B**

Gemini-2.5-pro: **B**

Qwen2.5-VL-72B: **B**

Claude-3.7-sonnet: **B, C**

Doubao-1.5-vision-pro: **B**

Grok-3: **B**

GPT-4o: **B**

Kimi-VL-A3B-Instruct: **B**

Figure 34: Example of **Layout** task across models

## D.3 DESIGN TASK FOR ERROR ANALYSIS

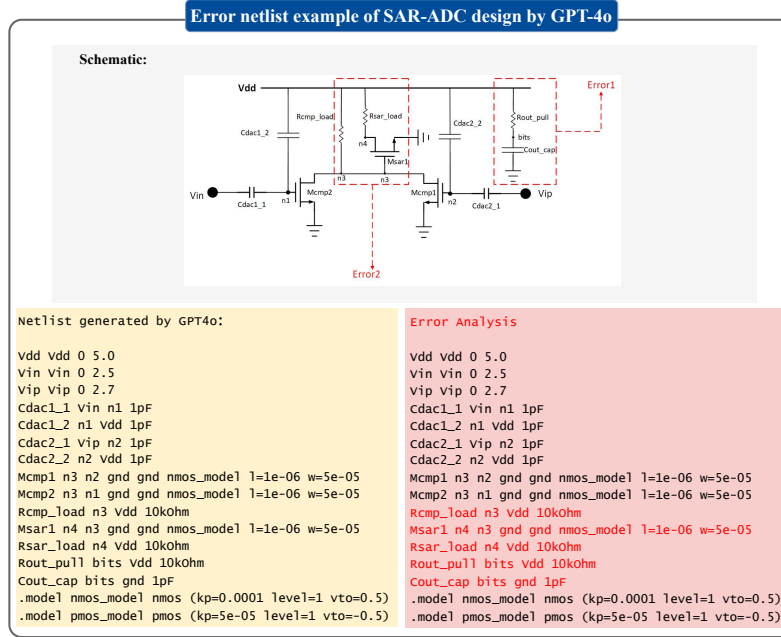Figure 35: Example of **Circuit Design** task by GPT-4o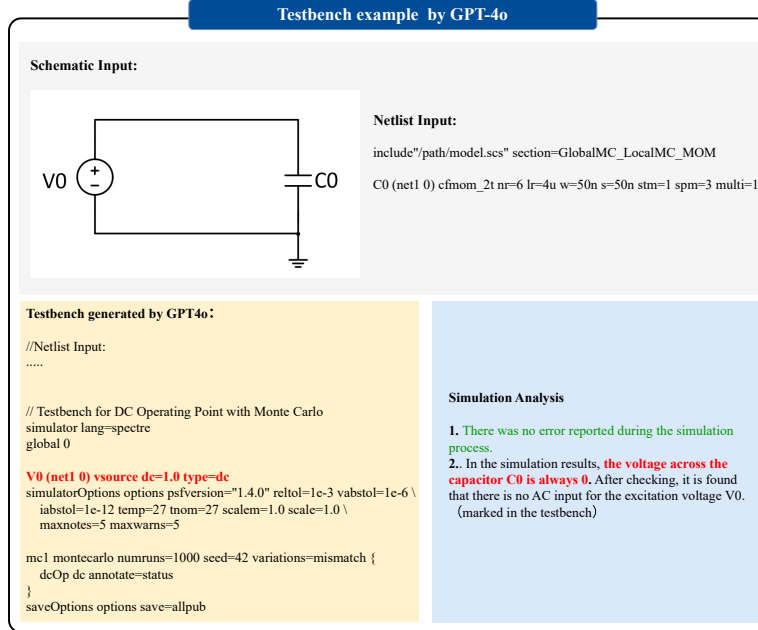Figure 36: Example of **Testbench Design** task by GPT-4o
